# Supplementary material
Source: PubMed Central journal article supplement (PMC9870939)
Supplement: NIHMS1855837-supplement-Supplemental_Publication_Material.pdf [file NIHMS1855837-supplement-Supplemental_Publication_Material.pdf]

**SUPPLEMENTAL MATERIAL**

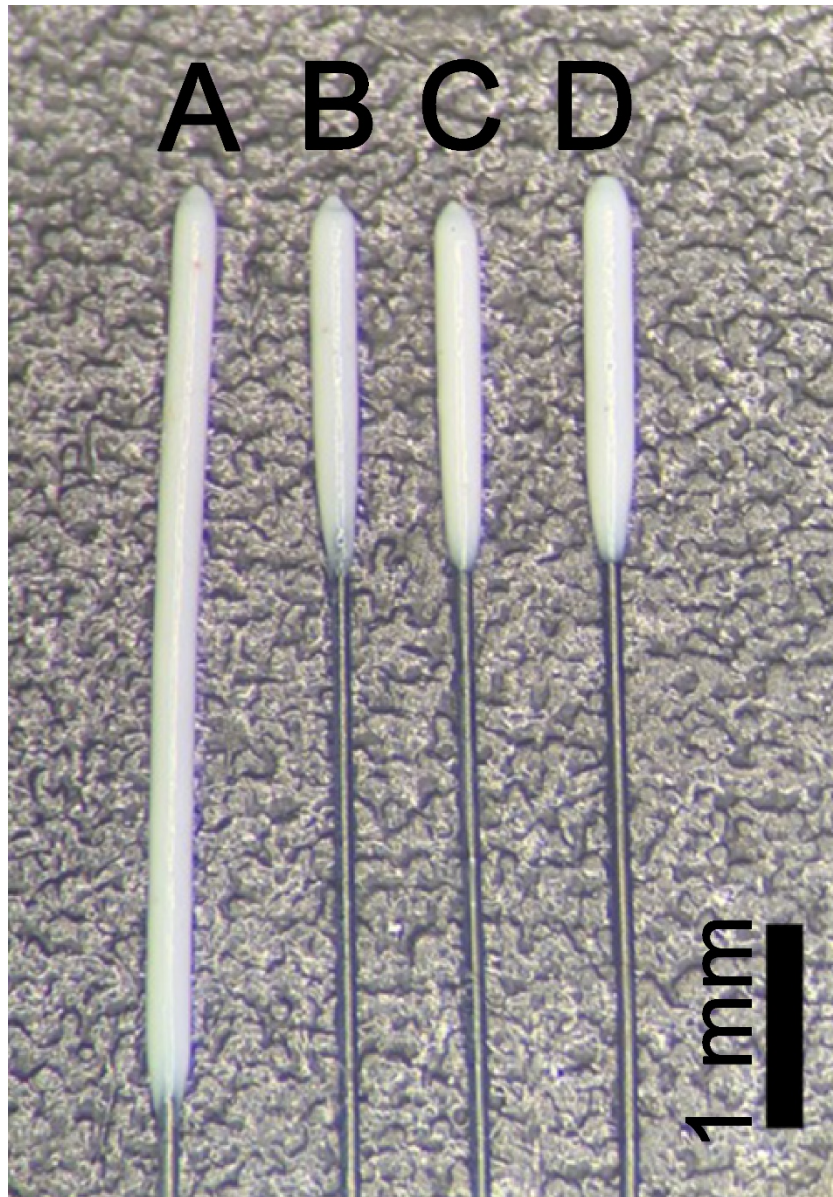

**Figure S1. Representative filaments with varying lengths and thicknesses of silicone coating.**

A, long filament (4-6 mm) with 0.22 mm thickness; B-D, short filaments (1-2 mm) with 0.21, 0.22, and 0.23 mm thickness (from left to right). Vertical bar = 1 mm.

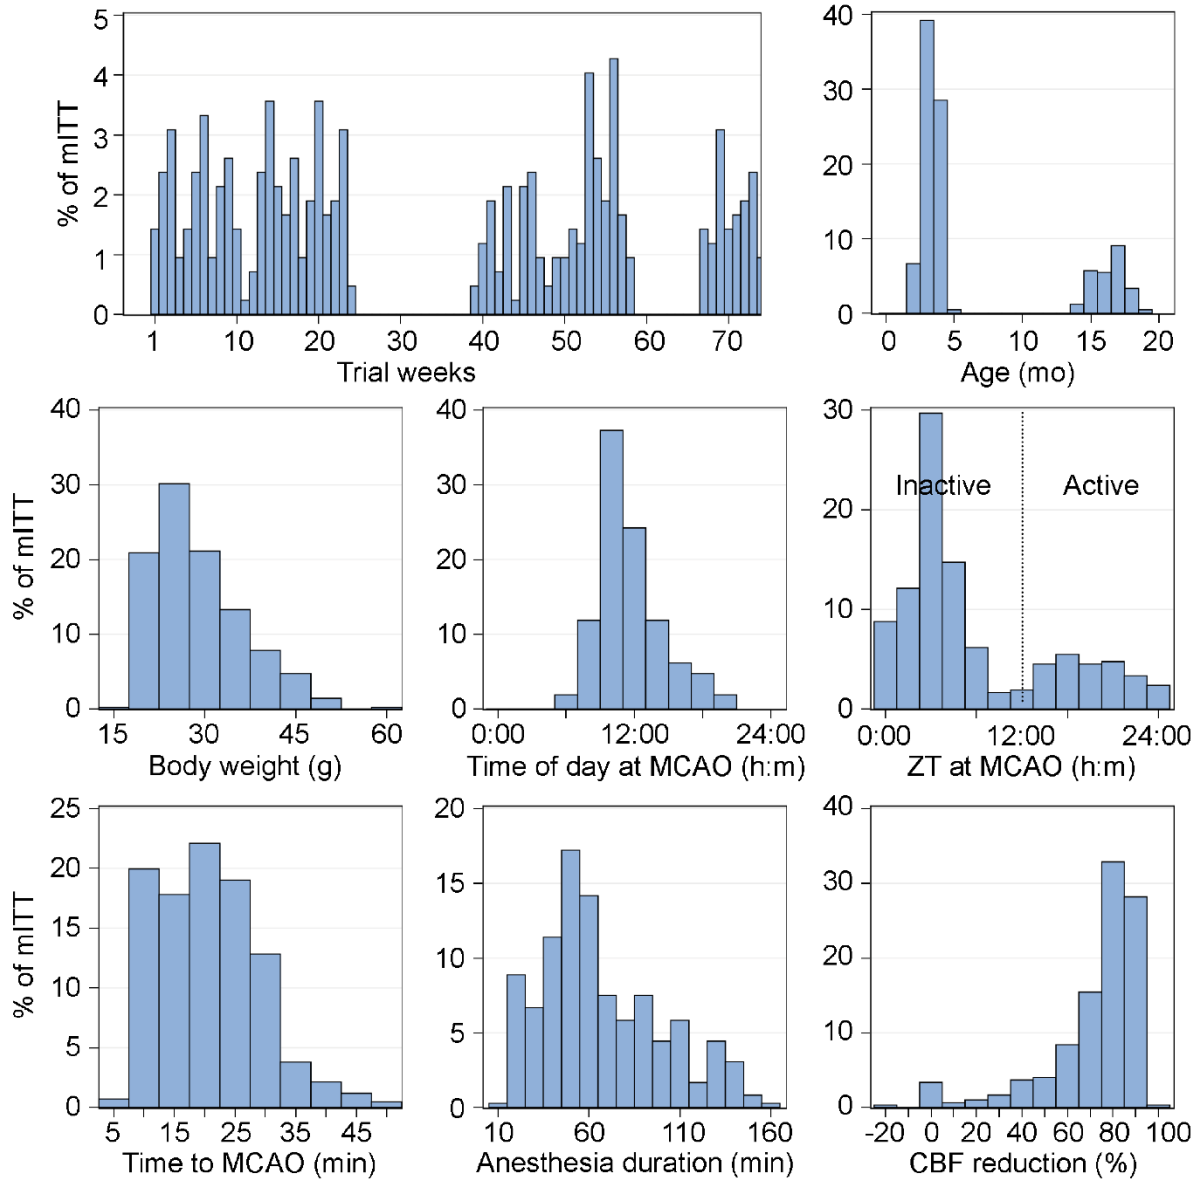

**Figure S2. Basic characteristics of the biological and procedural numerical variables.**

Histograms are displayed where the horizontal axis shows the center of each bin (numerical data are also presented in Supplemental Table 3).

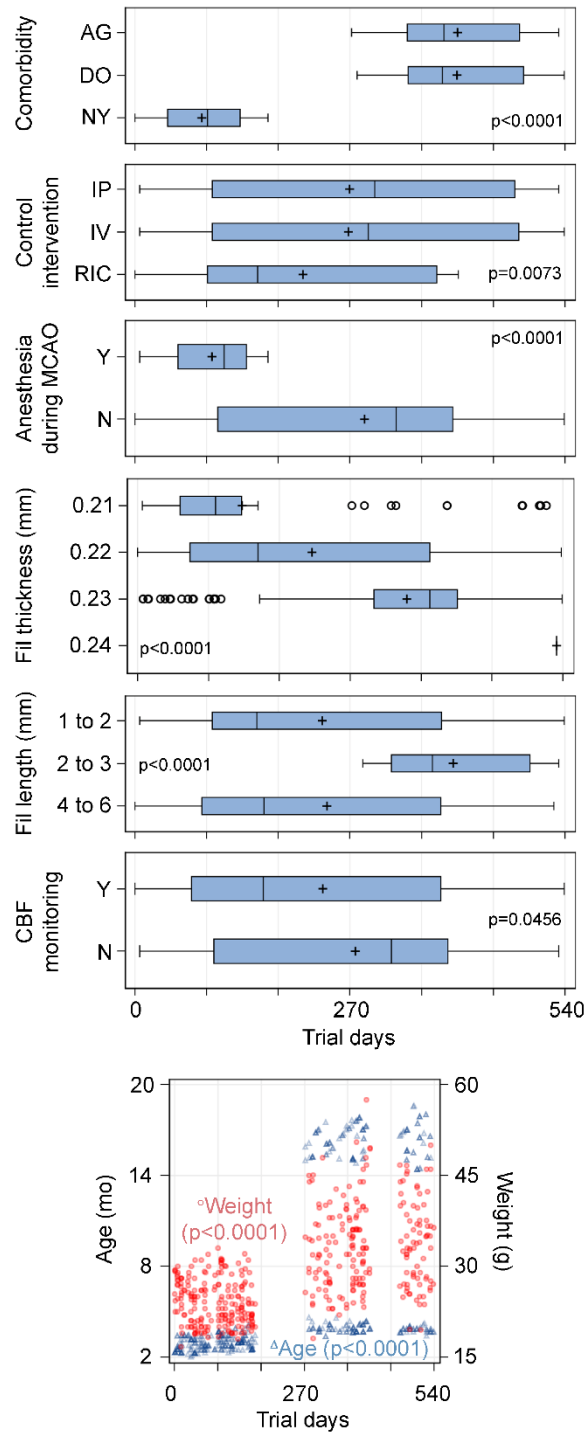

**Figure S3. Temporal heterogeneity throughout the trial.**

Whisker-box and scatter plots show the statistically significant temporal changes in independent variables during the trial (t-test, one-way ANOVA, or general linear model). Circles on whisker-box plots indicate data points outside the 1.5x interquartile range (IQR). The

scatter plot shows the association of age (blue triangles) and weight (red circles) with trial days. All p-values are adjusted by FDR.

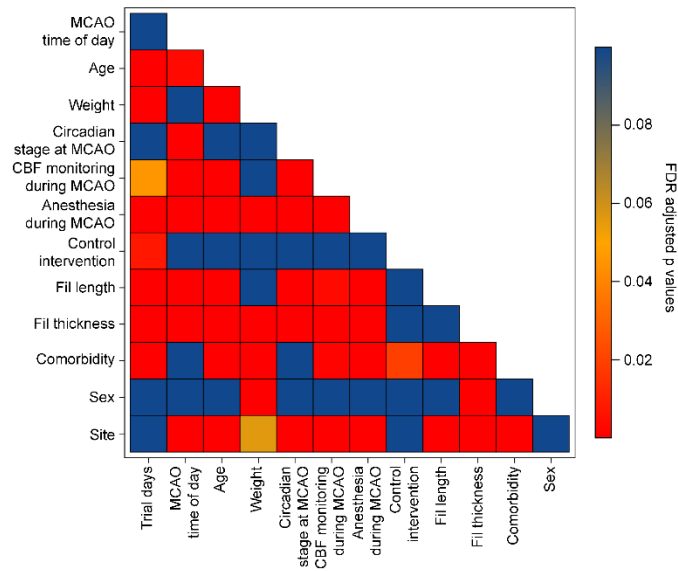

**Figure S4. Covariance matrix among the independent variables.**

More than half of pairwise associations between independent variables were statistically significant (t-test, one-way ANOVA, or general linear model). All p-values are adjusted by FDR. The direction of the relationship and effect size for the statistically significant associations are shown in Figures 2-5, Supplemental Table 3.

**Table S1. List of SPAN investigators.**

| <b>Site/Names</b>              | <b>Highest Degree</b> |
|--------------------------------|-----------------------|
| <b>NINDS</b>                   |                       |
| Francesca Bosetti              | PhD                   |
| James I. Koenig                | PhD                   |
| <b>Coordinating Center</b>     |                       |
| Patrick D. Lyden               | MD                    |
| Jessica Lamb                   | BS                    |
| Karisma Nagarkatti             | MS                    |
| <b>Augusta University</b>      |                       |
| David C. Hess                  | MD                    |
| Pradip K. Kamat                | PhD                   |
| Mohammad Badruzzaman Khan      | PhD                   |
| Krishnan Dhandapani            | PhD                   |
| Ali S. Arbab                   | MD, PhD               |
| Shahneela Siddiqui             | MS                    |
| Cameron Smith                  | MS                    |
| Mohammad Nisar                 | BS                    |
| <b>University of Iowa</b>      |                       |
| Enrique C. Leira               | MD, MS                |
| Anil K. Chauhan                | PhD                   |
| Nirav Dhanesha                 | PhD                   |
| Rakesh B. Patel                | PhD                   |
| Mariia Kumskova                | PhD                   |
| Daniel Thedens                 | PhD                   |
| Kai Wang                       | PhD                   |
| <b>Mass General</b>            |                       |
| Cenk Ayata                     | MD, PhD               |
| Andreia Morais                 | PhD                   |
| Takahiko Imai                  | PharmD, PhD           |
| Tao Qin                        | BS                    |
| Xuyan Jin                      | PhD                   |
| Taylan Denis Erdogan           | BS                    |
| Lili Yu                        | MD                    |
| Joseph B. Mandeville           | PhD                   |
| William Taylor Kimberly        | MD, PhD               |
| Jonah Patrick Weigand Whittier | BS                    |
| Eng Lo                         | PhD                   |
| Ken Arai                       | PhD                   |
| Klaus Van Leyen                | PhD                   |
| <b>Yale</b>                    |                       |

|                                |         |
|--------------------------------|---------|
| Lauren H. Sansing              | MD      |
| Fahmeed Hyder                  | PhD     |
| Jelena M. Mihailovic           | PhD     |
| Basavaraju G. Sanganahalli     | PhD     |
| Sebastian Diaz-Perez           | BS      |
| Sofia E. Velazquez             | BS      |
| Hannah E. Beatty               | BS      |
| Conor Johnson                  | BS      |
| Alison L. Herman               | BA      |
| Ligia S. B. Boisserand         | PhD     |
| Emma Immakavar                 | BS      |
| <b>Johns Hopkins</b>           |         |
| Raymond C. Koehler             | PhD     |
| Ted Dawson                     | PhD     |
| Valina Dawson                  | PhD     |
| Yanrong Shi                    | MD, MS  |
| Brooklyn Avery                 | BS      |
| Steven Lannon                  | BS      |
| Adnan Bibic                    | PhD     |
| Kazi Akhter                    | PhD     |
| Senthilkumar S. Karuppagounder | PhD     |
| <b>UT Houston</b>              |         |
| Jaroslav Aronowski             | MD, PhD |
| Louise D. McCullough           | MD, PhD |
| Lidiya Obertas                 | PhD     |
| Andrew Goh                     | MS      |
| Shuning Huang                  | PhD     |
| Anjali Chauhan                 | PhD     |

**Table S2.** Basic characteristics of study population, biological and procedural variables: categorical data.

|                                          |          | <b>N (% of mITT)</b> |
|------------------------------------------|----------|----------------------|
| <b>Enrollment site</b>                   | 1        | 48 (12)              |
|                                          | 2        | 81 (19)              |
|                                          | 3        | 58 (14)              |
|                                          | 4        | 64 (15)              |
|                                          | 5        | 81 (19)              |
|                                          | 6        | 89 (21)              |
| <b>Comorbidity model</b>                 | AG       | 106 (25)             |
|                                          | DO       | 109 (26)             |
|                                          | NY       | 206 (49)             |
| <b>Sex</b>                               | Female   | 210 (50)             |
|                                          | Male     | 211 (50)             |
| <b>Control intervention</b>              | IP       | 137 (33)             |
|                                          | IV       | 131 (31)             |
|                                          | RIC      | 153 (36)             |
| <b>Circadian stage (at time of MCAo)</b> | Active   | 111 (26)             |
|                                          | Inactive | 310 (74)             |
| <b>CBF (i.e., LDF) monitoring</b>        | No       | 123 (29)             |
|                                          | Yes      | 298 (71)             |
| <b>Anesthesia throughout MCAo</b>        | No       | 332 (79)             |
|                                          | Yes      | 89 (21)              |
| <b>Filament silicone thickness (mm)</b>  | 0.21     | 69 (16)              |
|                                          | 0.22     | 212 (50)             |
|                                          | 0.23     | 137 (33)             |
|                                          | 0.24     | 2 (0)                |
| <b>Filament silicone length (mm)</b>     | 1 to 2   | 233 (55)             |
|                                          | 2 to 3   | 26 (6)               |
|                                          | 4 to 6   | 161 (38)             |

A, Aged; DO, diet-induced obesity; NY, normal young; IP, intraperitoneal; IV, intravenous; RIC, remote ischemic conditioning; LDF, laser Doppler flowmetry. Numerical variables are shown in Figure 1 and Supplemental Table 3.



**Table S3.** Basic characteristics of study population, biological and procedural variables: numerical data.

|                                        | <b>N</b> | <b>Mean ± SD</b> | <b>Median</b> | <b>Min</b> | <b>IQR</b> | <b>Max</b> |
|----------------------------------------|----------|------------------|---------------|------------|------------|------------|
| <b>Age (months)</b>                    | 421      | 6.6±5.7          | 3.7           | 2.0        | 11.5       | 18.6       |
| <b>Weight (g)</b>                      | 421      | 28.9±7.4         | 27.2          | 16.7       | 9.8        | 57.5       |
| <b>Days into the trial</b>             | 421      | 247.7            | 279           | 0          | 299        | 539        |
| <b>Time of MCAo (real time of day)</b> | 421      | 11:30±2:51       | 10:55         | 5:40       | 3:12       | 19:47      |
| <b>Time of MCAo (ZT)</b>               | 421      | 7:46±6:38        | 4:56          | 0:00       | 9:33       | 23:54      |
| <b>Time to MCAo (min)</b>              | 421      | 20.7±8.5         | 20            | 7          | 12         | 50         |
| <b>Anesthesia duration (min)</b>       | 360      | 66.3±33.3        | 58            | 11         | 45         | 160        |
| <b>CBF drop (%)</b>                    | 299      | 71.5±21.6        | 79            | -19        | 18         | 95         |

IQR, interquartile range, ZT zeitgeber time.

**Table S4.** Distribution of categorical independent variables across sites.

|                                   |          | <b>1</b> | <b>2</b> | <b>3</b> | <b>4</b> | <b>5</b> | <b>6</b> | <b><math>\chi^2</math> p (adjusted)</b> |
|-----------------------------------|----------|----------|----------|----------|----------|----------|----------|-----------------------------------------|
| <b>Comorbidity model</b>          | AG       | 18       | 10       | 26       | 0        | 26       | 26       | <0.0001                                 |
|                                   | DO       | 10       | 28       | 0        | 27       | 17       | 27       |                                         |
|                                   | NY       | 20       | 43       | 32       | 37       | 38       | 36       |                                         |
| <b>Sex</b>                        | Female   | 24       | 38       | 31       | 31       | 40       | 46       | 0.9905                                  |
|                                   | Male     | 24       | 43       | 27       | 33       | 41       | 43       |                                         |
| <b>Control intervention</b>       | IP       | 20       | 26       | 16       | 20       | 23       | 32       | 0.4585                                  |
|                                   | IV       | 20       | 23       | 19       | 19       | 24       | 26       |                                         |
|                                   | RIC      | 8        | 32       | 23       | 25       | 34       | 31       |                                         |
| <b>Filament thickness</b>         | 0.21mm   | 23       | 0        | 1        | 6        | 23       | 16       | <0.0001                                 |
|                                   | 0.22mm   | 10       | 80       | 44       | 40       | 9        | 29       |                                         |
|                                   | 0.23mm   | 15       | 0        | 13       | 18       | 4        | 42       |                                         |
| <b>Filament length</b>            | 1-2mm    | 48       | 0        | 32       | 64       | 0        | 89       | <0.0001                                 |
|                                   | 2-3mm    | 0        | 0        | 26       | 0        | 0        | 0        |                                         |
|                                   | 4-6mm    | 0        | 80       | 0        | 0        | 81       | 0        |                                         |
| <b>CBF monitoring</b>             | No       | 48       | 0        | 0        | 0        | 55       | 20       | <0.0001                                 |
|                                   | Yes      | 0        | 81       | 58       | 64       | 26       | 69       |                                         |
| <b>Anesthesia throughout MCAo</b> | No       | 28       | 81       | 26       | 27       | 81       | 89       | <0.0001                                 |
|                                   | Yes      | 20       | 0        | 32       | 37       | 0        | 0        |                                         |
| <b>Circadian stage at MCAo</b>    | Active   | 0        | 0        | 55       | 54       | 2        | 0        | <0.0001                                 |
|                                   | Inactive | 48       | 81       | 3        | 10       | 79       | 89       |                                         |

Values represent the number of mice. p values were adjusted for multiplicity using false discovery rate. A, Aged; DO, diet-induced obesity; NY, normal young; IP, intraperitoneal; IV, intravenous; RIC, remote ischemic conditioning.

**Table S5.** Covariance among categorical independent variables.

|                                   |          | <b>Comorbidity model</b>  |         |         | $\chi^2$ p<br>(adjusted) |
|-----------------------------------|----------|---------------------------|---------|---------|--------------------------|
|                                   |          | AG                        | DO      | NY      |                          |
| <b>Filament thickness</b>         | 0.21mm   | 4                         | 7       | 58      | <0.0001                  |
|                                   | 0.22mm   | 44                        | 43      | 125     |                          |
|                                   | 0.23mm   | 58                        | 56      | 23      |                          |
| <b>Filament length</b>            | 1-2mm    | 44                        | 64      | 125     | <0.0001                  |
|                                   | 2-3mm    | 26                        | 0       | 0       |                          |
|                                   | 4-6mm    | 36                        | 44      | 81      |                          |
| <b>Control intervention</b>       | IP       | 37                        | 42      | 58      | 0.0195                   |
|                                   | IV       | 40                        | 35      | 56      |                          |
|                                   | RIC      | 29                        | 32      | 92      |                          |
| <b>Anesthesia throughout MCAo</b> | No       | 106                       | 109     | 117     | <0.0001                  |
|                                   | Yes      | 0                         | 0       | 89      |                          |
| <b>CBF monitoring</b>             | No       | 46                        | 27      | 50      | 0.0018                   |
|                                   | Yes      | 60                        | 82      | 156     |                          |
|                                   |          | <b>Filament thickness</b> |         |         |                          |
|                                   |          | 0.21 mm                   | 0.22 mm | 0.23 mm |                          |
| <b>Anesthesia throughout MCAo</b> | No       | 48                        | 145     | 136     | <0.0001                  |
|                                   | Yes      | 21                        | 67      | 1       |                          |
| <b>CBF monitoring</b>             | No       | 41                        | 19      | 61      | <0.0001                  |
|                                   | Yes      | 28                        | 193     | 76      |                          |
| <b>Circadian stage at MCAo</b>    | Active   | 7                         | 73      | 31      | 0.0008                   |
|                                   | Inactive | 62                        | 139     | 106     |                          |
|                                   |          | <b>Filament length</b>    |         |         |                          |
|                                   |          | 1-2 mm                    | 2-3 mm  | 4-6 mm  |                          |
| <b>Anesthesia throughout MCAo</b> | No       | 144                       | 26      | 161     | <0.0001                  |
|                                   | Yes      | 89                        | 0       | 0       |                          |
| <b>CBF monitoring</b>             | No       | 68                        | 0       | 55      | 0.0032                   |
|                                   | Yes      | 165                       | 26      | 161     |                          |
| <b>Circadian stage at MCAo</b>    | Active   | 86                        | 23      | 2       | <0.0001                  |
|                                   | Inactive | 147                       | 3       | 159     |                          |

Only statistically significant associations are shown. Please see Supplemental Figure 4 for a full covariance matrix. A, Aged; DO, diet-induced obesity; NY, normal young; IP, intraperitoneal; IV, intravenous; RIC, remote ischemic conditioning.

**Table S6.** Multivariable analyses for CBF drop, time to MCAo, and anesthesia duration.

|                                    | CBF drop |        |        | Time to MCAo |          |          | Anesthesia duration |          |          |
|------------------------------------|----------|--------|--------|--------------|----------|----------|---------------------|----------|----------|
|                                    | Initial  | Final  | SDS    | Initial      | Final    | SDS      | Initial             | Final    | SDS      |
| <b>Comorbidity</b>                 | 0.4005   |        |        | < 0.0001     | < 0.0001 | < 0.0001 | 0.0037              | 0.0427   | 0.0799   |
| <b>Sex</b>                         | 0.6635   |        |        | 0.4463       | 0.0007   | 0.0037   | 0.1590              | 0.0126   | 0.0372   |
| <b>Age</b>                         | 0.1901   |        |        | 0.7001       |          |          | 0.7041              |          |          |
| <b>Age x Age</b>                   | 0.6715   |        |        | 0.5664       |          |          | 0.8400              |          |          |
| <b>Weight</b>                      | 0.6780   |        |        | 0.3184       | 0.0237   | 0.0694   | 0.2624              |          |          |
| <b>Weight x Weight</b>             | 0.9098   |        |        | 0.5762       |          |          | 0.5164              |          |          |
| <b>Sex x Age</b>                   | 0.3705   |        |        | 0.7154       |          |          | 0.1996              |          |          |
| <b>Sex x Weight</b>                | 0.2900   |        |        | 0.8986       |          |          | 0.6064              |          |          |
| <b>Age x Weight</b>                | 0.4488   |        |        | 0.7059       |          |          | 0.2411              |          |          |
| <b>CBF monitoring</b>              | NA       |        |        | < 0.0001     | < 0.0001 | 0.0001   | 0.0004              | 0.0001   | 0.0007   |
| <b>Filament thickness</b>          | 0.0045   | 0.0006 | 0.0006 | 0.5716       |          |          | 0.7294              |          |          |
| <b>Filament length</b>             | 0.0058   | 0.0001 | 0.0001 | 0.0913       |          |          | < 0.0001            | < 0.0001 | < 0.0001 |
| <b>Control intervention</b>        | 0.8218   |        |        | 0.9332       |          |          | < 0.0001            | < 0.0001 | < 0.0001 |
| <b>Trial days</b>                  | 0.0259   |        |        | 0.0368       | 0.0009   | 0.0037   | 0.2335              | 0.0048   | 0.0239   |
| <b>Trial days x Trial days</b>     | 0.0246   |        |        | 0.4382       |          |          | 0.9037              |          |          |
| <b>Anesthesia throughout MCAo</b>  | 0.4074   |        |        | < 0.0001     | < 0.0001 | < 0.0001 | < 0.0001            | < 0.0001 | < 0.0001 |
| <b>Surgery time</b>                | 0.8482   |        |        | 0.1273       | 0.1215   | 0.1215   | 0.3310              | 0.0408   | 0.0799   |
| <b>Surgery time x Surgery time</b> | 0.7618   |        |        | 0.0534       | 0.0435   | 0.0852   | 0.2000              |          |          |
| <b>Circadian stage</b>             | 0.5526   |        |        | 0.0919       |          |          | 0.0045              | 0.0052   | 0.0239   |
| <b>Site</b>                        | 0.1423   | 0.1164 |        | 0.0924       | 0.0607   |          | .                   | .        |          |
| <b>R<sup>2</sup> without site</b>  | 0.2871   | 0.1818 |        | 0.3674       | 0.1639   |          | 0.9190              | 0.9163   |          |
| <b>R<sup>2</sup> with site</b>     | 0.4627   | 0.4315 |        | 0.5407       | 0.5299   |          | 0.9190              | 0.9163   |          |

Table shows initial and final p-values (Type 3 Tests of Fixed Effects) as well as the final p-values adjusted for multiplicity using stepdown Sidak (SDS). The final model represents significant associations remaining after stepwise backward elimination. Effect sizes are shown on Table 2 and Figure 4. The R<sup>2</sup> values without and with the site are also shown to highlight the influence of site.
